# Supplementary material for: Inter- and Intra-Individual Variability of Personal Health Risk of Combined Particle and Gaseous Pollutants across Selected Urban Microenvironments
Source: MDPI journal article supplement (doi:10.3390/ijerph19010565), 2022-01-05
Supplement: s1 [file s1]

## Supplementary file S1

### 1. Sensors for measuring personal exposure concentrations

Twenty-four hours personal exposure concentrations of PM<sub>2.5</sub>, NO<sub>2</sub>, O<sub>3</sub> and CO<sub>2</sub> were across the various urban microenvironment were measured using an integrated portable sensor system. Table S1 shows the specifications of the sensors using in the integrated portable system to measure personal exposure concentrations.

**Table S1. Specifications of sensors used in integrated portable sensor systems to measure personal exposure concentrations.**

| Sensor specifications | Pollutants                   |                                    |                                          |                         |
|-----------------------|------------------------------|------------------------------------|------------------------------------------|-------------------------|
|                       | PM <sub>2.5</sub>            | NO <sub>2</sub>                    | O <sub>3</sub>                           | CO <sub>2</sub>         |
| Concentration range   | 0-1000 µg/m <sup>3</sup>     | 0~20 ppm                           | 0~20 ppm                                 | 0~5000 ppm              |
| Detection limit       | 1 µg/m <sup>3</sup>          | 5 ppb                              | 0.01 ppm                                 | 300 ppm                 |
| Accuracy              | ± 10% to calibration aerosol | ±10 ppb (under normal maintenance) | ±10 ppb or 15% of measured concentration | ±10% of reading         |
| Sensor technology     | Optical                      | Electrochemical                    | Electrochemical                          | Nondispersive infrared  |
| Manufacturer          | Metone, Grants Pass, OR      | Alphasense, Braintree, UK          | Alphasense, Braintree, UK                | Dynamant, Mansfield, UK |

### 2. CO<sub>2</sub> concentrations as an indicator of microenvironments

Carbon dioxide (CO<sub>2</sub>) is produced by human exhalation as a metabolic process function (Persily, 1997). Thus, the outdoor CO<sub>2</sub> concentrations level is lower than the CO<sub>2</sub> concentrations in indoor environments because of human occupancy (Satish et al., 2012). A number of studies identified the presence or absence of any occupant in indoor areas based on CO<sub>2</sub> concentration (Calì et al., 2015; Jiang et al., 2016; Pedersen et al., 2017; Sun et al., 2011; Szczurek et al., 2017). Fig. S1 shows an example of temporal CO<sub>2</sub> concentration variation across the microenvironments visited by a participant in a day from morning to evening. Because CO<sub>2</sub> concentration substantially varies between indoor and outdoor

microenvironments and among different indoor microenvironments depending on the occupancy number and ventilation condition, real-time CO<sub>2</sub> concentration time-series were used in this study to check consistency of the recorded time-location patterns of the individual.

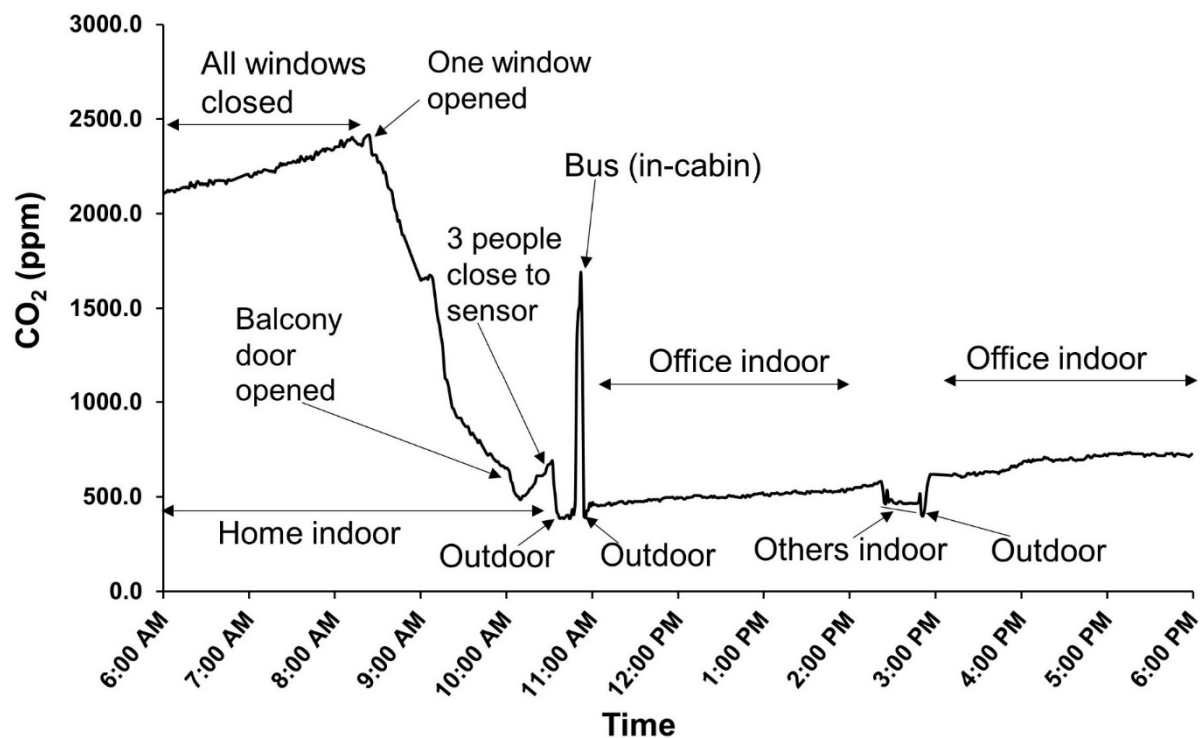

**Figure S1.** Example of temporal CO<sub>2</sub> concentration variation across the microenvironments visited by a participant in a day from morning to evening.

### 3. Comparison of health risk estimation between 1-minute personal exposure concentrations and 3-h moving average concentrations

Health risk (added health risk, AR) for combined personal PM<sub>2.5</sub>, NO<sub>2</sub> and O<sub>3</sub> exposure concentrations were quantified following the study by Wong et al. (2013). In our study, AR was estimated based on continuous 1-minute personal exposure concentrations, although Wong et al. (2013) quantified AR hourly based on a 3-h moving average of ambient concentrations. This is because we quantified AR in each microenvironment across the person-days, and participants spent less than 3 hours in some of the microenvironments. Thus, 3-h moving average concentrations may cause misrepresentation of those microenvironments by averaging before

and after microenvironmental concentrations.

Percentage difference in AR estimation between 1-minute average data and 3-hour moving average concentration for each pollutant in each person-day, regardless of the microenvironments, was estimated (Cole and Altman, 2017):

$$E_p = \left| \frac{AR_{p,1min} - AR_{p,3hour}}{\frac{AR_{p,1min} + AR_{p,3hour}}{2}} \right| \times 100 \quad (1)$$

Where  $E_p$  is the percentage difference in daily average AR estimation between 1-minute average data and 3-hour moving average concentration of pollutant  $p$ .  $AR_{p,1min}$  is the daily average AR estimation based on 1-minute average data of pollutant  $p$ .  $AR_{p,3hour}$  is the daily average AR estimation based on 3-hour moving average concentration of pollutant  $p$ .

Fig. S2 shows the percentage difference in daily average AR estimation between 1-minute average data and 3-hour moving average concentration for each pollutant in each person-day across the participants. The results showed that the median differences of AR estimation between 1-minute exposure concentrations and 3-h moving average concentrations were less than 2% for each pollutant, regardless of the microenvironments.

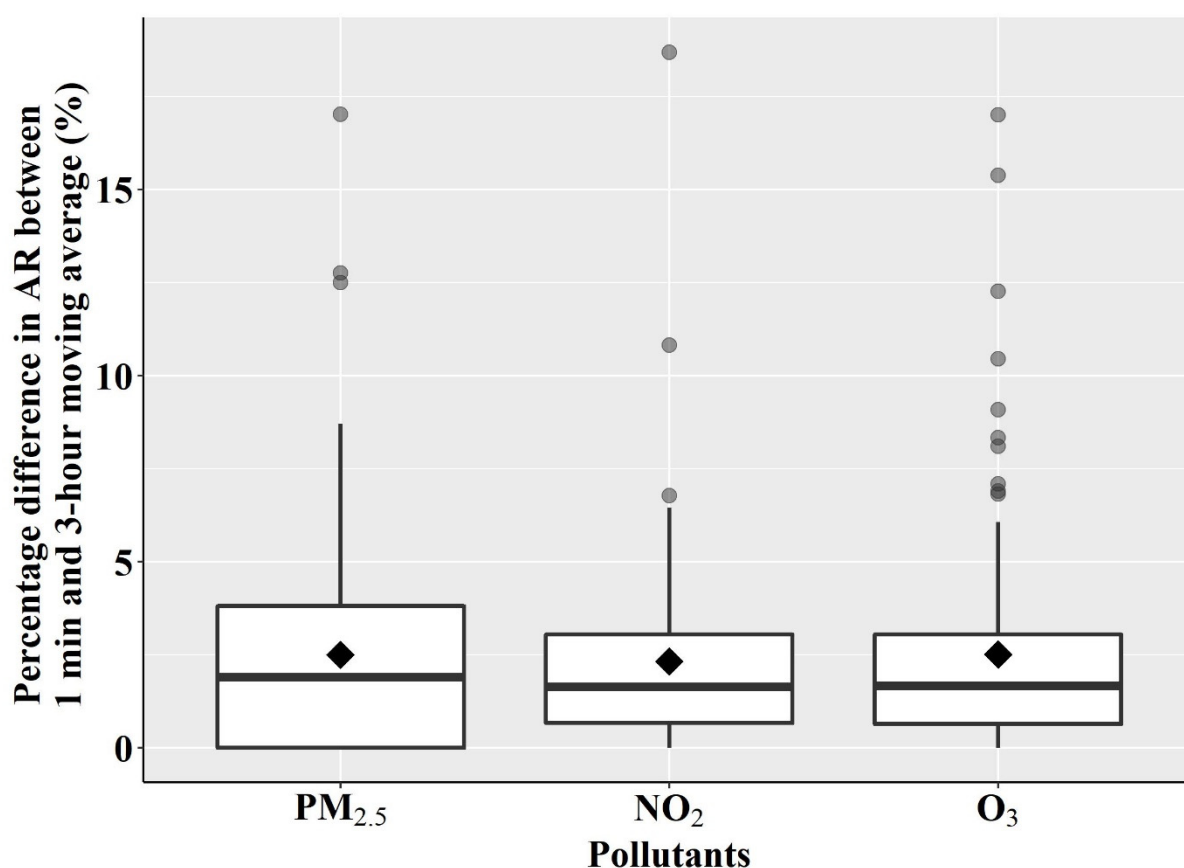

**Figure S2.** Percentage difference in daily average AR estimation between 1-minute average data and 3-hour moving average concentration for each pollutant in each person-day (N = 106).

#### 4. General characteristics of the study participants

General characteristics of the study participants are provided in Table S2.

**Table S2.** General characteristics of the study participants (N=21).

| Characteristics                    |                            | No. (%)     |
|------------------------------------|----------------------------|-------------|
| Study subjects (N)                 |                            | 21          |
| Average person-days per subject    |                            | 5 days      |
| Total person-days of measurement   |                            | 106 days    |
| Age (years)                        |                            | 21-60 years |
| Occupation                         |                            |             |
|                                    | Postgraduate student       | 7 (33.3%)   |
|                                    | Faculty                    | 7 (33.3%)   |
|                                    | Office staff               | 7 (33.3%)   |
| Type of ventilation status at home |                            |             |
|                                    | Open window                | 10 (47.6%)  |
|                                    | Turn on air-condition (AC) | 1 (4.8%)    |
|                                    | Open window and turn on AC | 10 (47.6%)  |
| AC type in home                    |                            |             |
|                                    | Window type AC             | 16 (76.2%)  |
|                                    | Split type AC              | 2 (9.5%)    |

|                                             |                          |            |
|---------------------------------------------|--------------------------|------------|
|                                             | Both window and split AC | 3 (14.3%)  |
| Cooking stoves                              |                          |            |
|                                             | Town gas                 | 13 (61.9%) |
|                                             | Electricity              | 8 (38.1%)  |
| Cooking duration per day                    |                          |            |
|                                             | <80 minutes              | 6 (28.6%)  |
|                                             | ≥80 minutes              | 15 (71.4%) |
| Frequency of floor cleaning                 |                          |            |
|                                             | Everyday                 | 14 (66.7%) |
|                                             | Sometimes in a week      | 7 (33.3%)  |
| Floor                                       |                          |            |
|                                             | ≤8                       | 14 (66.7%) |
|                                             | >8                       | 7 (33.3%)  |
| Occupants (person)                          |                          |            |
|                                             | <4                       | 14 (66.7%) |
|                                             | ≥4                       | 7 (33.3%)  |
| Smoking (by participants or family members) |                          | No         |

## 5. Inter-and intra-individual variability in daily time spent across the selected microenvironments

To quantify variance component in daily time spent across the selected microenvironments, a linear mixed-effects model with only a random intercept was developed (Koehler et al., 2019; Li et al., 2020). Variance component analysis in daily time spent was performed separately for each microenvironment.

$$Y_{ijk} = \mu + b_i + \varepsilon_{ijk} \quad (1)$$

Where  $Y_{ijk}$  is the log-transformed daily time spent in a microenvironment  $k$  at person-day  $j$  for participant  $i$ . For Office indoor microenvironment, daily time spent is not log-transformed because residuals are normally distributed without log-transformation.  $\mu$  is the fixed mean (logged) daily time spent for all subjects.  $\varepsilon_{ijk}$  is the error. In linear mixed-effects models, person-specific random effect  $b_i$  assumed to be normally distributed with zero mean and variance  $\sigma_{inter}^2$  ( $\sigma_{inter}^2$  (the inter-individual variability). Error  $\varepsilon_{ijp}$  is assumed to be normal distribution with zero mean and variance  $\sigma_{intra}^2$  (the intra- variability). The variance components for inter-and intra-individual were estimated using the method of restricted maximum likelihood (REML) (Xu,

2003).

The proportion of inter-and intra-individual variability of daily time spent in each microenvironment is given in Table S3. Intra-individual variability in daily time spent in all microenvironments ranging from 59% - 91% was higher than the inter-individual variability.

**Table S3. Proportion of inter-and intra-individual variability of daily time spent in each microenvironment.**

| Microenvironments          | Inter-individual variance,<br>$\sigma_{\text{inter}}^2$ (% of total) | Intra-individual variance,<br>$\sigma_{\text{intra}}^2$ (% of total) |
|----------------------------|----------------------------------------------------------------------|----------------------------------------------------------------------|
| Home indoor                | 15                                                                   | 85                                                                   |
| Office indoor <sup>a</sup> | 9                                                                    | 91                                                                   |
| Others indoor              | 26                                                                   | 74                                                                   |
| Outdoor                    | 39                                                                   | 61                                                                   |
| Transit                    | 41                                                                   | 59                                                                   |

Notes:  $\text{ICC} = \sigma_{\text{inter}}^2 / (\sigma_{\text{inter}}^2 + \sigma_{\text{intra}}^2)$ , indicates the proportion of the total variations attributed to inter-individual variance

<sup>a</sup>Daily time spent is not log-transformed

## 6. Personal exposure concentrations of PM<sub>2.5</sub>, NO<sub>2</sub> and O<sub>3</sub> across the selected microenvironments

Table S4 presents summary statistics of personal exposure concentrations of PM<sub>2.5</sub>, NO<sub>2</sub> and O<sub>3</sub> in each microenvironment across the participants.

**Table S4. Summary statistics of personal exposure concentrations of PM<sub>2.5</sub>, NO<sub>2</sub> and O<sub>3</sub> in each microenvironment across the participants.**

| Microenvironments | N<br>(1-min) | PM <sub>2.5</sub>               |                               | NO <sub>2</sub>                 |                               | O <sub>3</sub>                  |                               |
|-------------------|--------------|---------------------------------|-------------------------------|---------------------------------|-------------------------------|---------------------------------|-------------------------------|
|                   |              | Mean<br>( $\mu\text{gm}^{-3}$ ) | SD<br>( $\mu\text{gm}^{-3}$ ) | Mean<br>( $\mu\text{gm}^{-3}$ ) | SD<br>( $\mu\text{gm}^{-3}$ ) | Mean<br>( $\mu\text{gm}^{-3}$ ) | SD<br>( $\mu\text{gm}^{-3}$ ) |
| Home indoor       | 96259        | 20                              | 12                            | 33                              | 19                            | 31                              | 22                            |
| Office indoor     | 34973        | 4                               | 3                             | 26                              | 14                            | 35                              | 17                            |
| Others indoor     | 6661         | 19                              | 32                            | 42                              | 33                            | 24                              | 20                            |
| Outdoor           | 3343         | 21                              | 12                            | 66                              | 45                            | 42                              | 31                            |
| Transit           | 5355         | 17                              | 16                            | 89                              | 94                            | 15                              | 15                            |

N: 1-minute observations; SD: Standard deviation

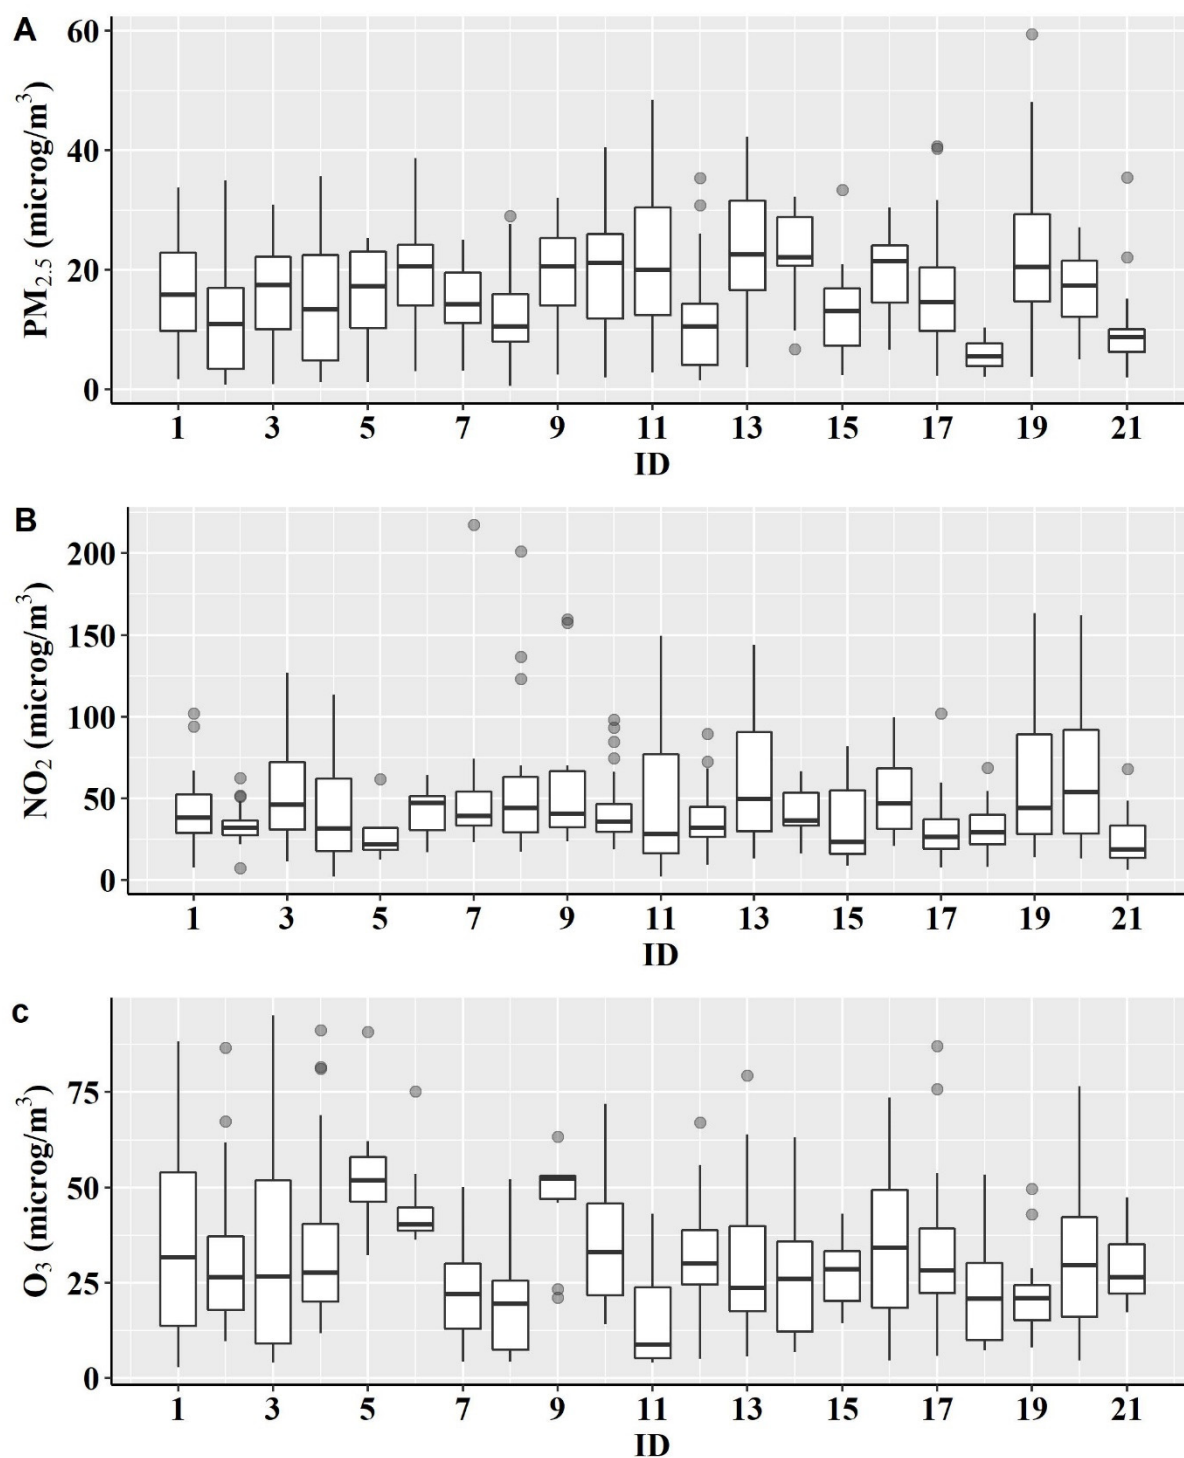

**Figure S3. Distribution of personal exposure concentrations of  $\text{PM}_{2.5}$ ,  $\text{NO}_2$  and  $\text{O}_3$  for each participant.**

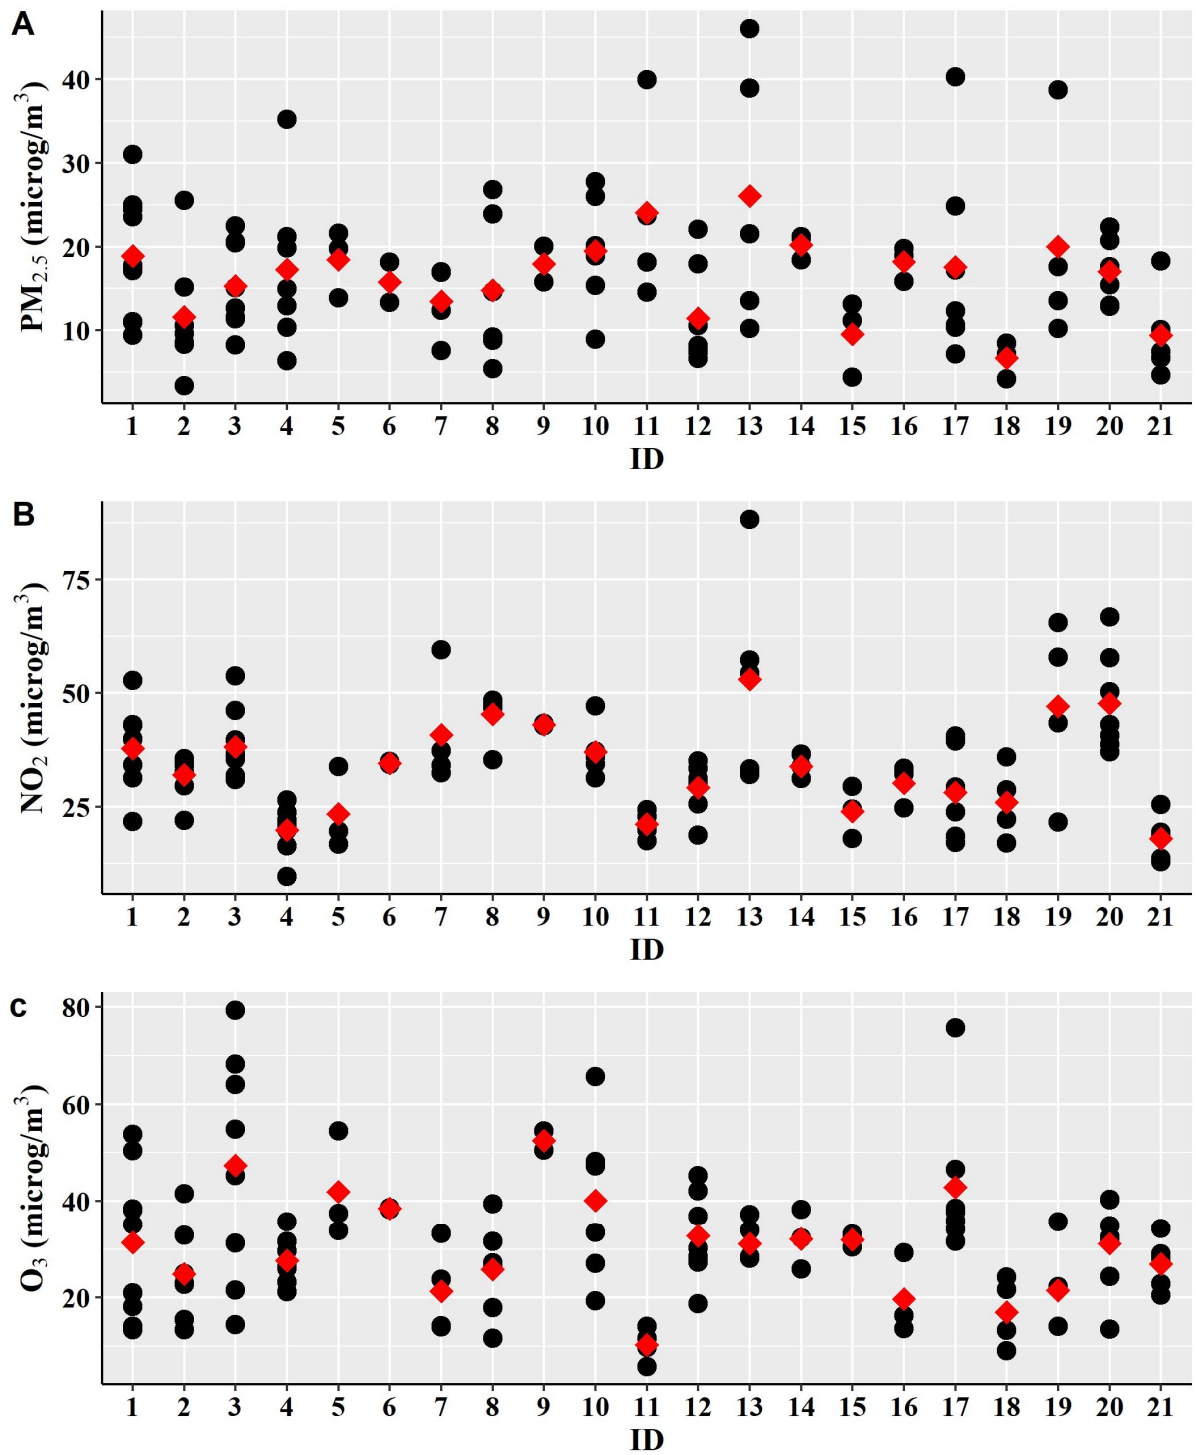

**Figure S4.** Temporal variation of PM<sub>2.5</sub>, NO<sub>2</sub> and O<sub>3</sub> exposure concentrations across different person-days of the participants. Black circle represents the average concentrations in each person-day. Red square indicates mean concentration of different person-days for a participant.

## 7. Relationship of ambient PM<sub>2.5</sub>, NO<sub>2</sub> and O<sub>3</sub> concentrations between Fixed-site monitor and residence-location



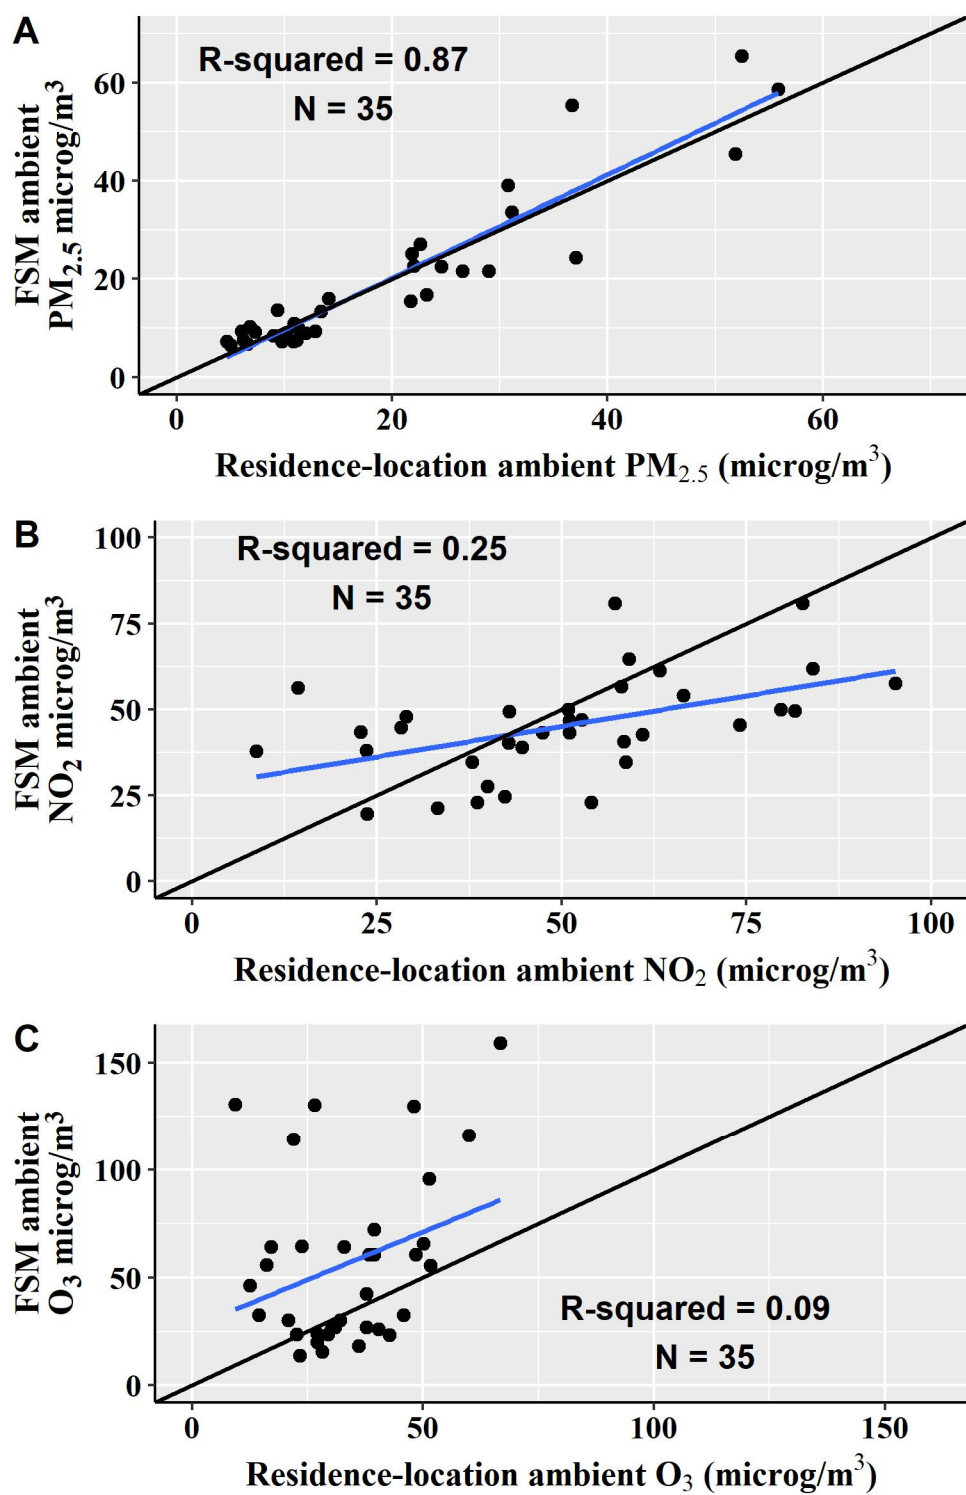

**Figure S5. Relationship of daily average ambient  $\text{PM}_{2.5}$ ,  $\text{NO}_2$  and  $\text{O}_3$  concentrations between Fixed-site monitor and residence-location: (A)  $\text{PM}_{2.5}$ , (B)  $\text{NO}_2$  and (C)  $\text{O}_3$ . FSM denotes fixed-site monitor.**

## **8. Time-integrated health risk for combined $\text{PM}_{2.5}$ , $\text{NO}_2$ and $\text{O}_3$ exposure concentrations**

Health risk and time-integrated health risk for combined  $\text{PM}_{2.5}$ ,  $\text{NO}_2$  and  $\text{O}_3$  exposure

concentrations across the selected microenvironments are given in Table S5.

**Table S5. Time-integrated health risk for combined PM<sub>2.5</sub>, NO<sub>2</sub> and O<sub>3</sub> exposure concentrations across the selected microenvironments.**

| Microenvironment | N   | Health Risk, AR <sub>combine</sub><br>(%) | Mean % time-integrated<br>AR <sub>combine</sub> (SD) |
|------------------|-----|-------------------------------------------|------------------------------------------------------|
|                  |     | <b>Mean (SD)</b>                          |                                                      |
| Home indoor      | 106 | 3.45 (1.19)                               | 64 (19)                                              |
| Office indoor    | 86  | 3.02 (0.84)                               | 27 (15)                                              |
| Others indoor    | 82  | 3.82 (1.40)                               | 6 (8)                                                |
| Outdoor          | 85  | 5.35 (1.61)                               | 5 (5)                                                |
| Transit          | 78  | 5.42 (3.27)                               | 7 (7)                                                |

N, person-days; SD, Standard deviation; AR<sub>combine</sub> = AR<sub>PM2.5</sub> + AR<sub>NO2</sub> + AR<sub>O3</sub>

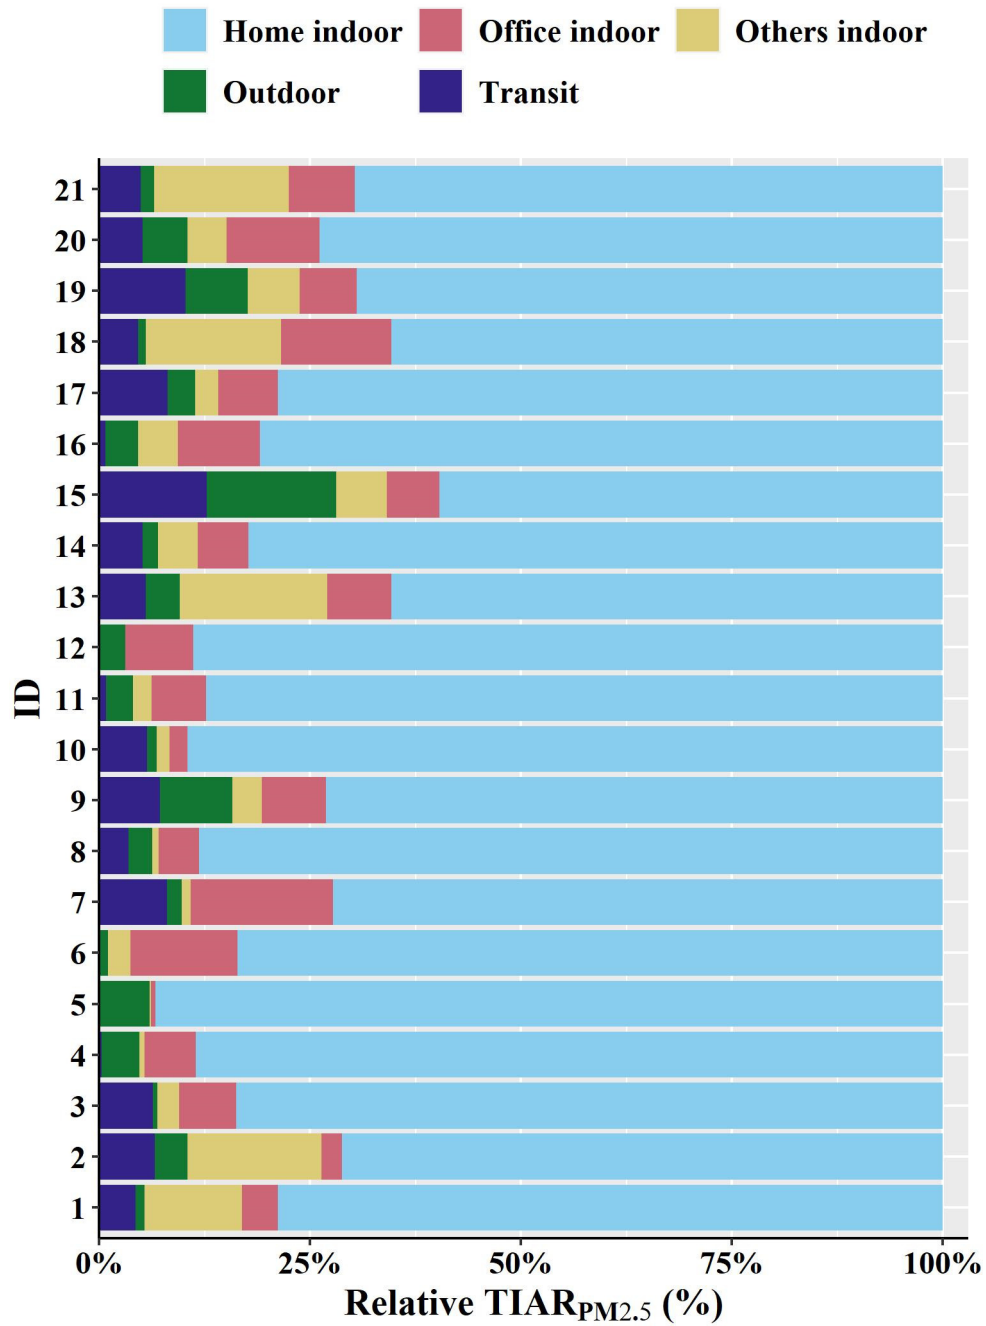

**Figure S6. Variability of of the daily time-integrated health risk (TIAR) for PM<sub>2.5</sub> across the selected microenvironments for each participant.**

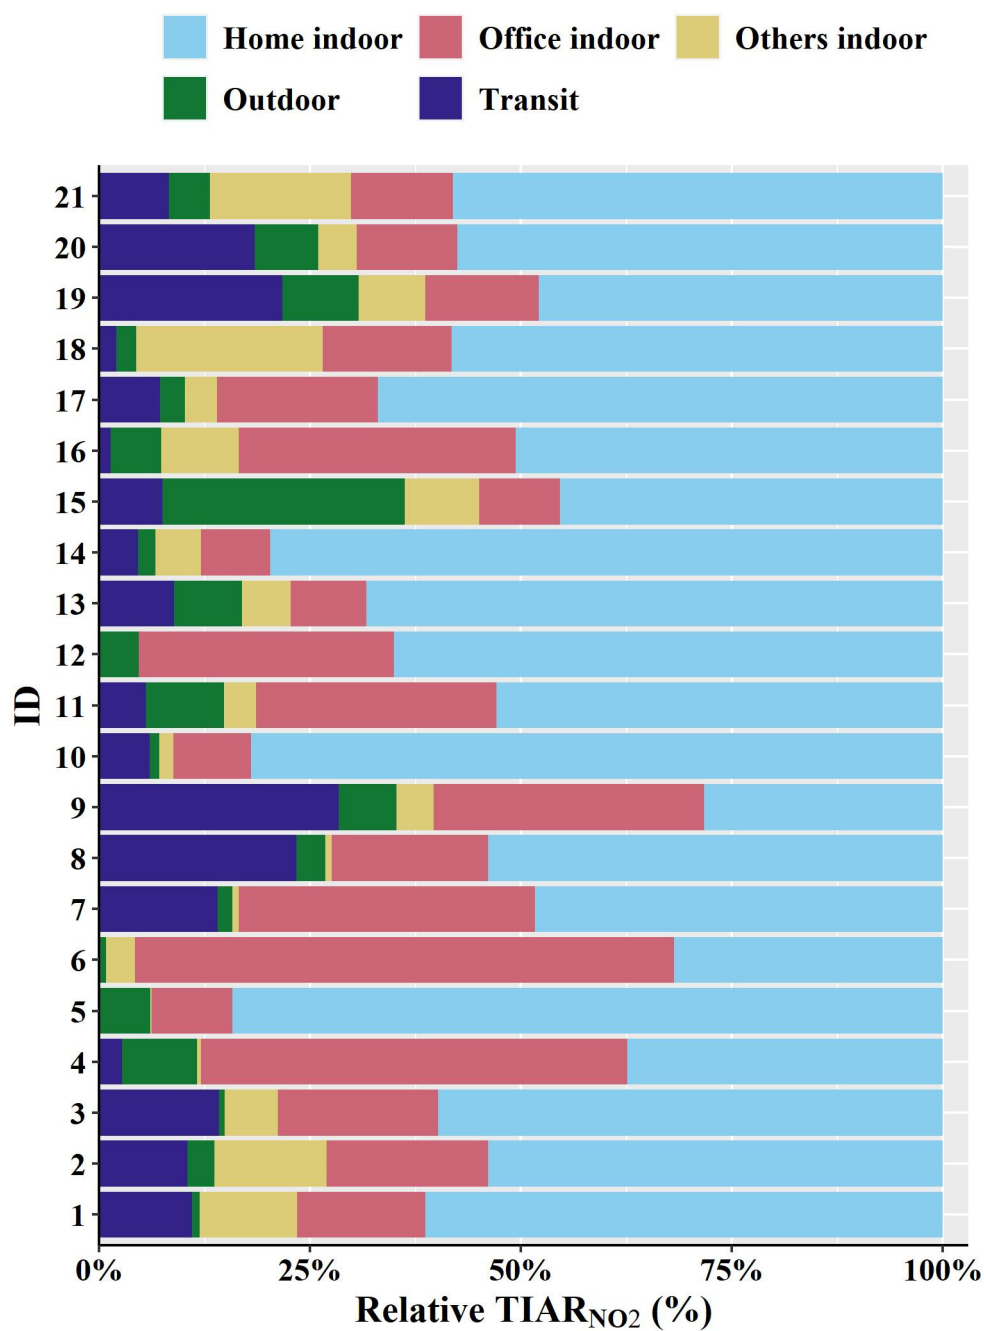

**Figure S7. Variability of of the daily time-integrated health risk (TIAR) for NO<sub>2</sub> across the selected microenvironments for each participant.**

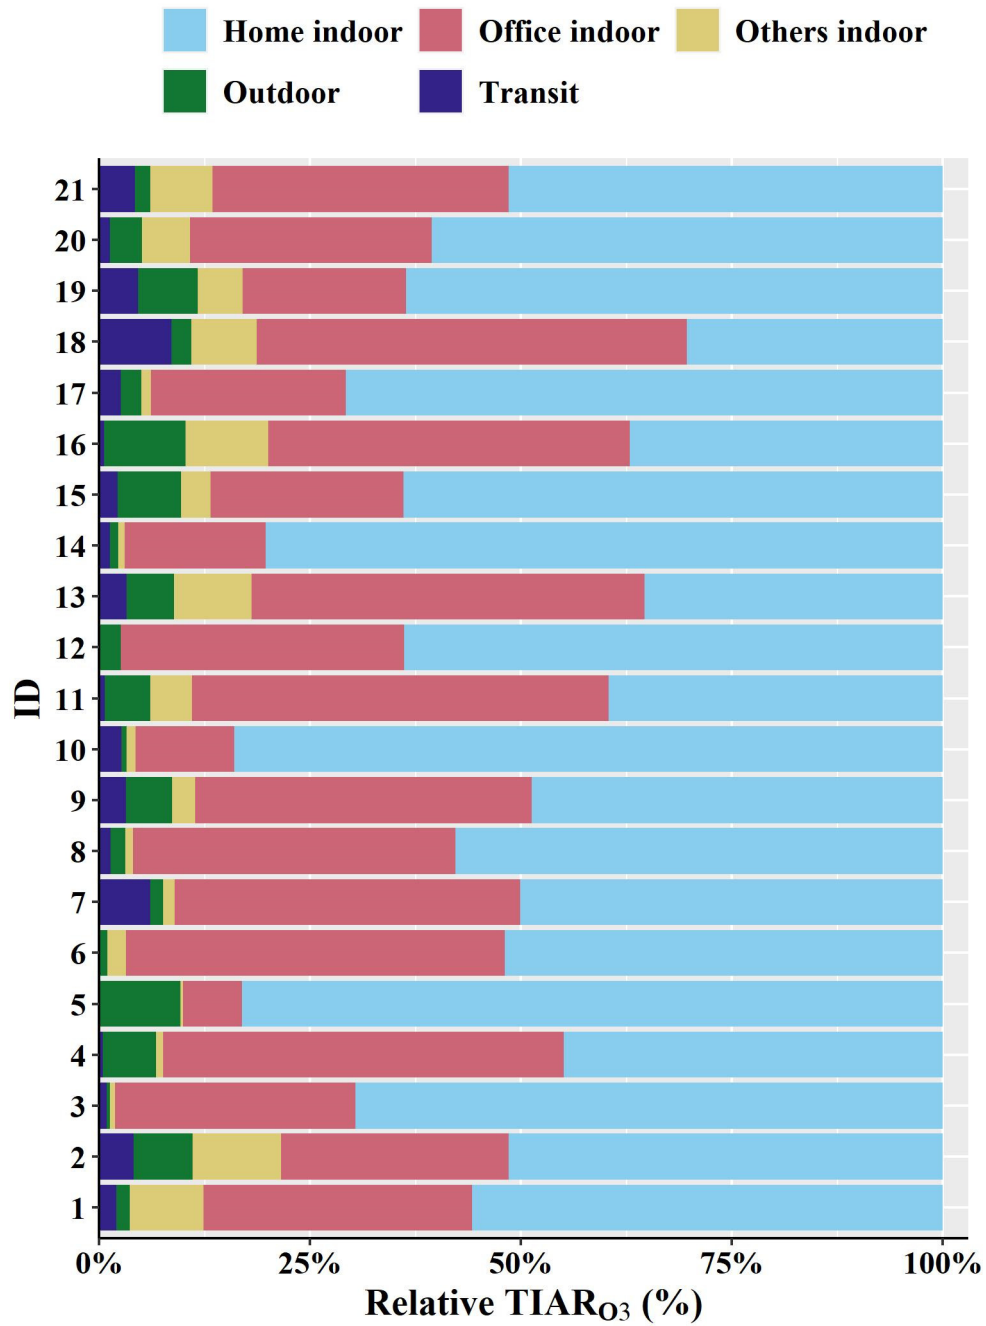

**Figure S8.** Variability of of the daily time-integrated health risk (TIAR) for  $O_3$  across the selected microenvironments for each participant.

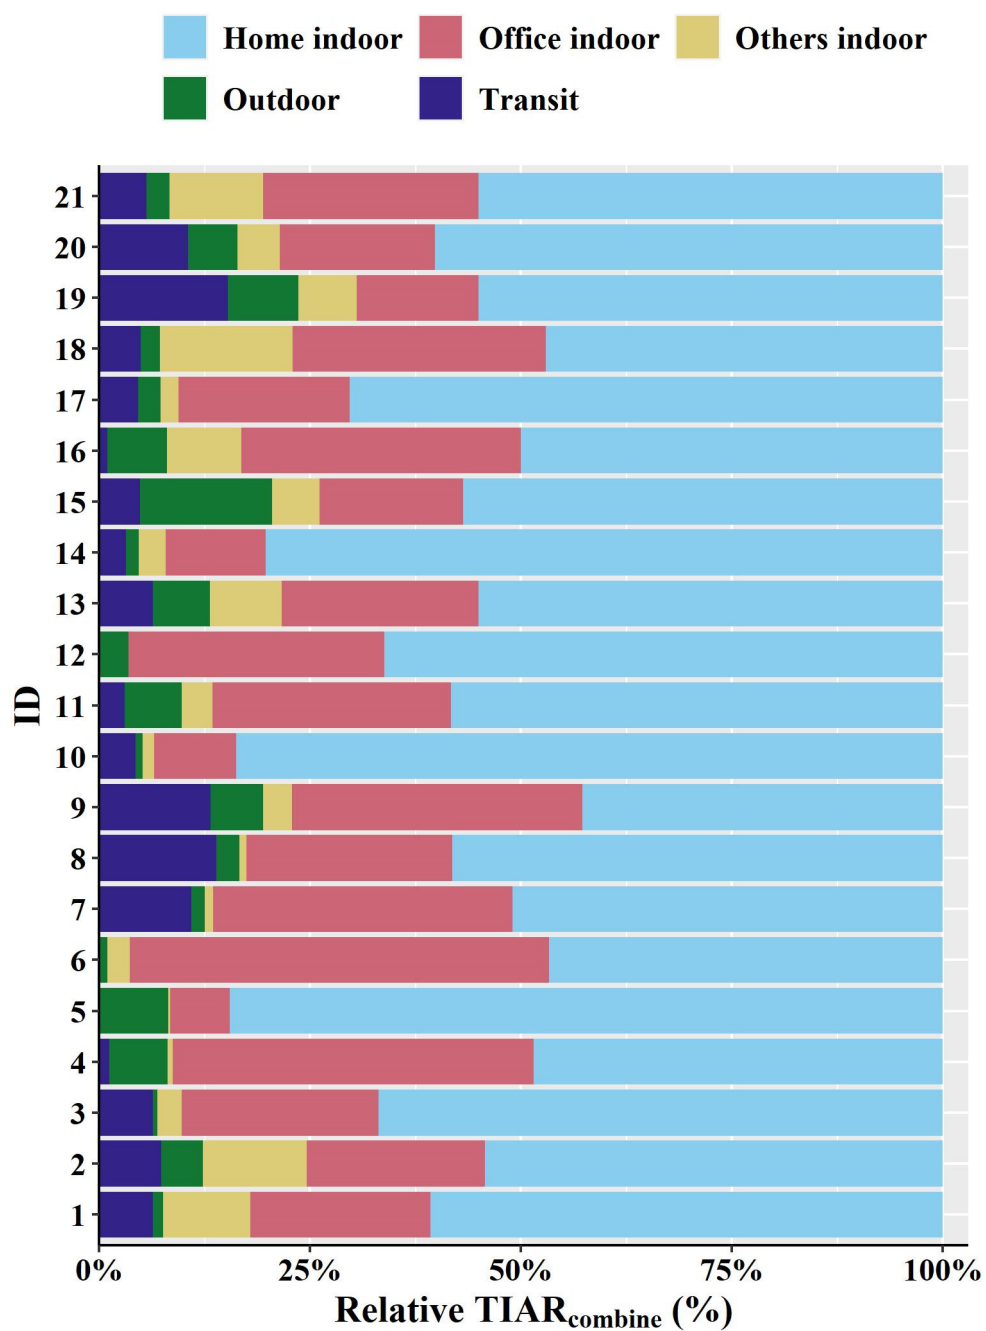

**Figure S9.** Variability of of the daily time-integrated health risk (TIAR) for combined PM<sub>2.5</sub>, NO<sub>2</sub> and O<sub>3</sub> exposure concentrations across the selected microenvironments for each participant.

## References

- Calì, D., Matthes, P., Huchtemann, K., Streblow, R., Müller, D., 2015. CO<sub>2</sub> based occupancy detection algorithm: Experimental analysis and validation for office and residential buildings. *Build. Environ.* 86, 39–49. <https://doi.org/10.1016/j.buildenv.2014.12.011>
- Cole, T.J., Altman, D.G., 2017. Statistics Notes: What is a percentage difference? *BMJ* 358, 3663. <https://doi.org/10.1136/bmj.j3663>
- Jiang, C., Masood, M.K., Soh, Y.C., Li, H., 2016. Indoor occupancy estimation from carbon dioxide concentration. *Energy Build.* 131, 132–141. <https://doi.org/10.1016/j.enbuild.2016.09.002>
- Pedersen, T.H., Nielsen, K.U., Petersen, S., 2017. Method for room occupancy detection based on trajectory of indoor climate sensor data. *Build. Environ.* 115, 147–156. <https://doi.org/10.1016/j.buildenv.2017.01.023>
- Persily, A.K., 1997. Evaluating building IAQ and ventilation with indoor carbon dioxide. *ASHRAE Trans.* 103, 193–204.
- Satish, U., Mendell, M.J., Shekhar, K., Hotchi, T., Sullivan, D., 2012. Concentrations on Human Decision-Making Performance. *Environ. Health Perspect.* 120, 1671–1678.
- Sun, Z., Wang, S., Ma, Z., 2011. In-situ implementation and validation of a CO<sub>2</sub>-based adaptive demand-controlled ventilation strategy in a multi-zone office building. *Build. Environ.* 46, 124–133. <https://doi.org/10.1016/j.buildenv.2010.07.008>
- Szczurek, A., Maciejewska, M., Pietrucha, T., 2017. Occupancy determination based on time series of CO<sub>2</sub> concentration, temperature and relative humidity. *Energy Build.* 147, 142–154. <https://doi.org/10.1016/j.enbuild.2017.04.080>
- Wong, T.W., Tam, W.W.S., Yu, I.T.S., Lau, A.K.H., Pang, S.W., Wong, A.H.S., 2013. Developing a risk-based air quality health index. *Atmos. Environ.* 76, 52–58. <https://doi.org/10.1016/J.ATMOSENV.2012.06.071>
